# Supplementary material
Source: PubMed Central journal article supplement (PMC2776440)
Supplement: 0904285106_0904285106SI.pdf [file 0904285106_0904285106SI.pdf]

# Supporting Information

Joksimovic et al. 10.1073/pnas.0904285106

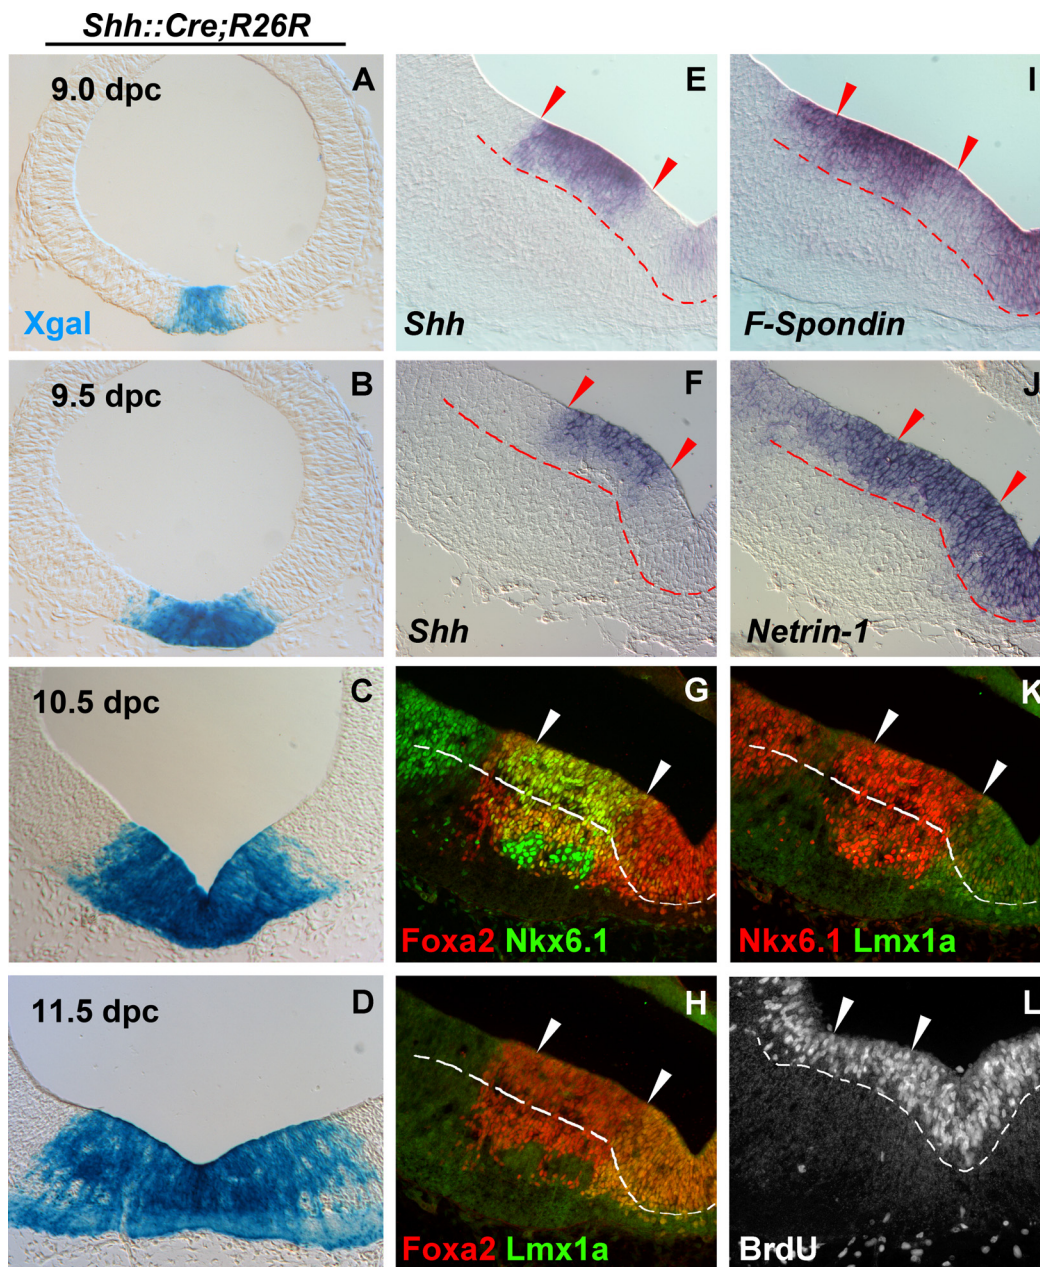

**Fig. S1.** Molecular characteristics of the *Shh* domain. (A–D) Lateral expansion of *Shh* during midbrain development. In *Shh::Cre;R26R* coronal midbrain sections, Xgal labeling is initially restricted at the immediate ventral midline at 9.0 dpc (A) and then flares out laterally between 9.5 and 11.5 dpc (B–D). At later stages, Xgal labeling is detected not only in the ventricular zone where *Shh* expression is confined (E and F), but also in the adjacent mantle layer, coinciding with an appearance of postmitotic neurons (see also Fig. 1). The cumulative *Shh* domain is characterized by expression of known floor-plate markers. (E–H) Coronal midbrain sections at 11.5 dpc showing *Shh* (E and F) predominantly in the lateral domain (in all sections the approximate position of the lateral *Shh* domain is demarcated by red or white arrowheads, and the dotted line demarcates the ventricular zone). *F-spondin* (I) is expressed throughout the ventral midline, although it is more robust in the region corresponding to the lateral *Shh* domain; expression also extends a few cells lateral to *Shh*. *Netrin-1* (J) is also expressed throughout the midline and extends lateral to *Shh*. *Foxa2* (G) is expressed throughout the ventral midline, and appears to extend a few cells lateral to *Shh*. *Nkx6.1* appears to largely coincide with the lateral *Shh* domain. The *Nkx6.1* and *Lmx1a* domains (K) appear separate, although the domains overlap by 1–2 cells; further, faint *Nkx6.1* is observed in many *Lmx1a*+ progenitors. The *Foxa2* domain extends well beyond *Lmx1a* (H). (L) In 12.5-dpc embryo sections, many BrdU+ cells are observed throughout the ventral midbrain, suggesting that all these progenitor domains are still neurogenically active. Taken together, the *Shh* domain expands during development, expresses several floor-plate markers, and is mitotically active.





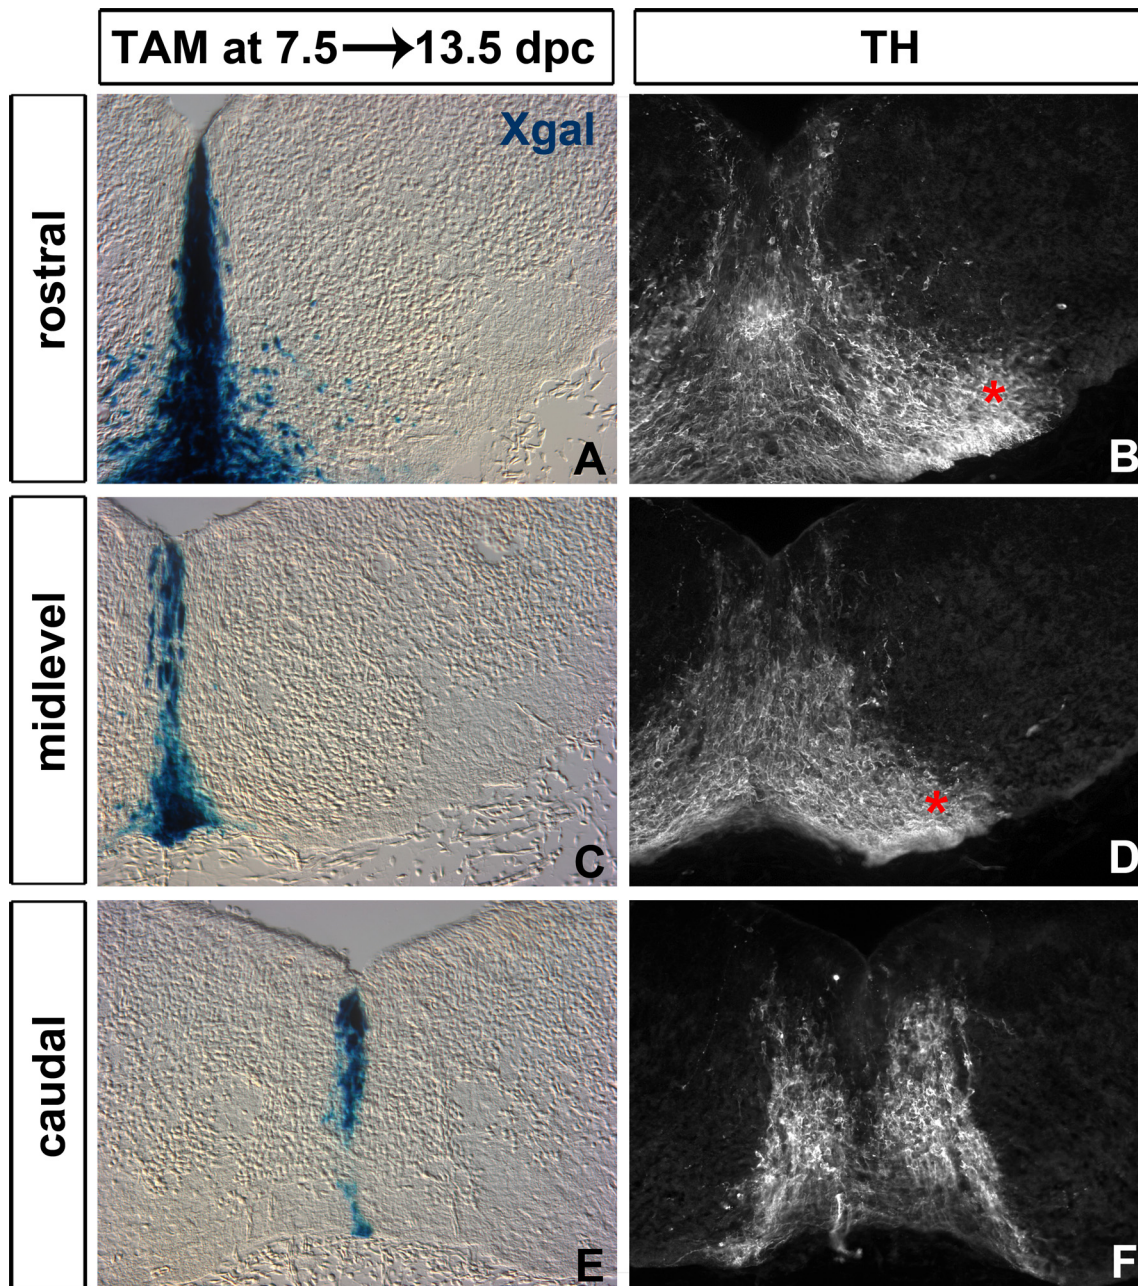

**Fig. S3.** Xgal and TH labeling on coronal midbrain adjacent sections along anterior posterior axes in 7.5 dpc tamoxifen-induced *Shh::CreERT<sup>2</sup>,R26R* embryos. (A–F) In 7.5 (injection) → 13.5 dpc (harvest), at rostral and midlevels, Xgal-labeled cells are observed emanating from medial progenitors into the medial aspects of the TH+ domain (A–D). Very few Xgal cells are observed in the lateral aspects of the TH+ domain (asterisks in B and D). At caudal levels, only few Xgal-labeled cells are detected in the mantle, and only within the medial aspects of TH+ domain (E and F). These findings support a model wherein rostrally, the medial progenitor domain contributes little to the SNpc. Furthermore, the caudal medial progenitor domain may be narrower, and perhaps less neurogenic than its rostral counterpart.



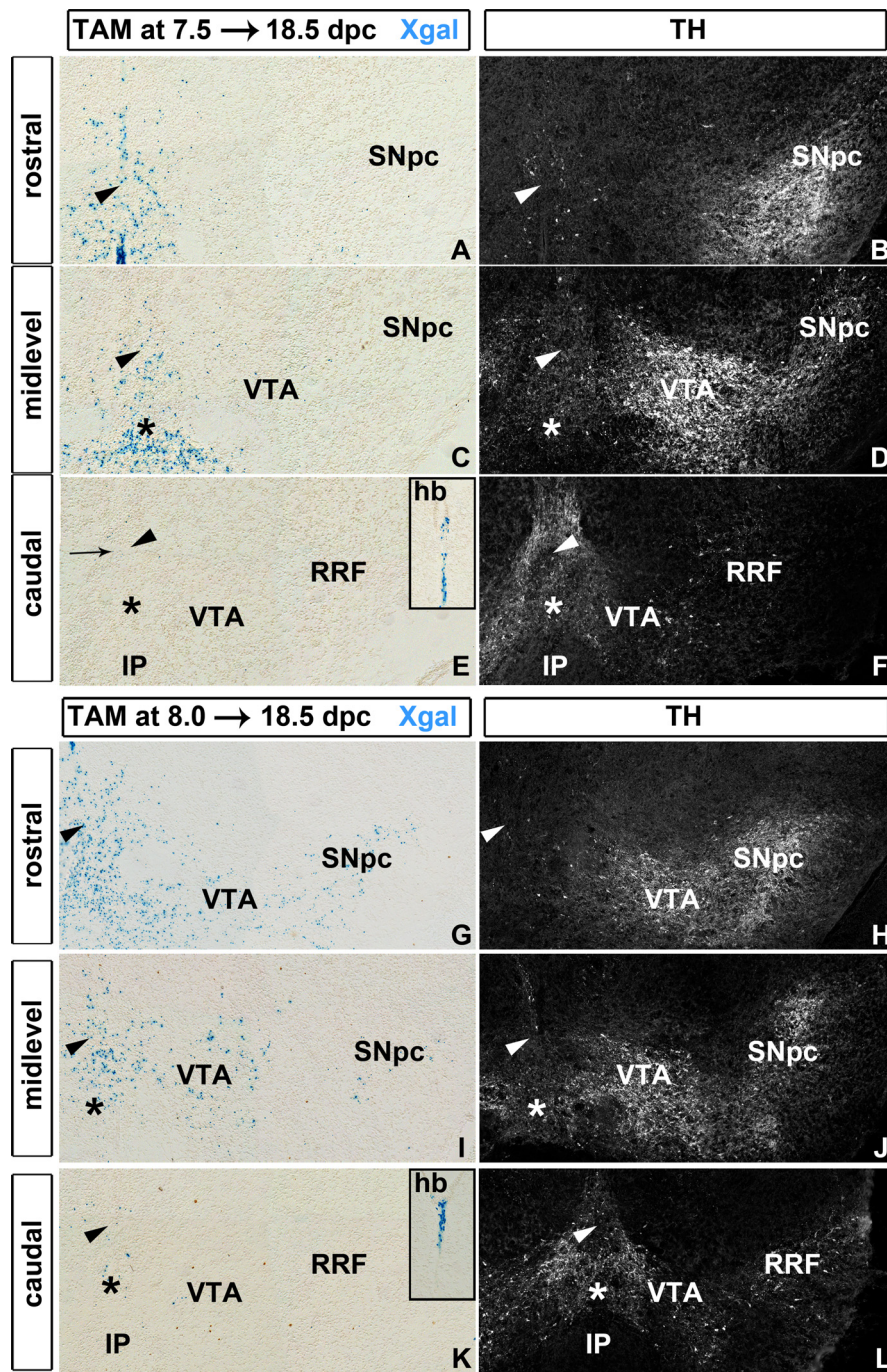

**Fig. S4.** Xgal and TH labeling on coronal midbrain sections along anterior posterior axes in 7.5 and 8.0 dpc tamoxifen-induced *Shh::CreER<sup>T2</sup>,R26R* embryos. (A–F) In 7.5 (injection) → 18.5 dpc (harvest), at rostral and midaxial levels, Xgal-labeled cells are observed predominantly in the rostral linear nucleus (arrowheads) and dopamine, (TH+), ventral tegmental area (VTA)/interfascicular nucleus (IF; asterisk) regions. [Note, the section in D (TH detection) is immediately rostral to the section in C (Xgal detection), and contains only the rostral tip of the IF with some TH+ cells (asterisk in D).] In contrast, very few Xgal+ cells are observed in the substantia nigra pars compacta (SNpc). At caudal levels, a few Xgal cells are detected in the rostral linear nucleus (arrow), but none in the VTA/IF (asterisk) regions or the retrorubral fields (RRF). The hindbrain midline shows several labeled cells (*E Inset*). (G–L) 8.0 (injection) → 18.5 dpc (harvest), at rostral and midaxial levels, results in labeling of cells in the rostral linear nucleus (arrowheads) and dopamine, (TH+), neurons in the VTA/IF (asterisk) regions as well as in the SNpc (G and I). At the caudal levels (K), some Xgal cells are detected in the rostral linear nucleus (arrowhead) and dopamine, (TH+), VTA/IF (asterisk) regions, but none in the RRF. Xgal cells are also observed in the hindbrain midline (*K Inset*). TH-labeled sections in B, D, F, H, J, and L were adjacent to the Xgal-labeled sections shown in A, C, E, G, I, and K, respectively. Adjacent to these were sections labeled with Pitx3 (not shown) used to determine the position of the predominantly TH–/Pitx3+ rostral linear nucleus. Taken together, these findings show that differential labeling of dopamine clusters along the anterior-posterior axis of the midbrain is dependent upon the time of TAM administration. IP, interpeduncular nucleus.



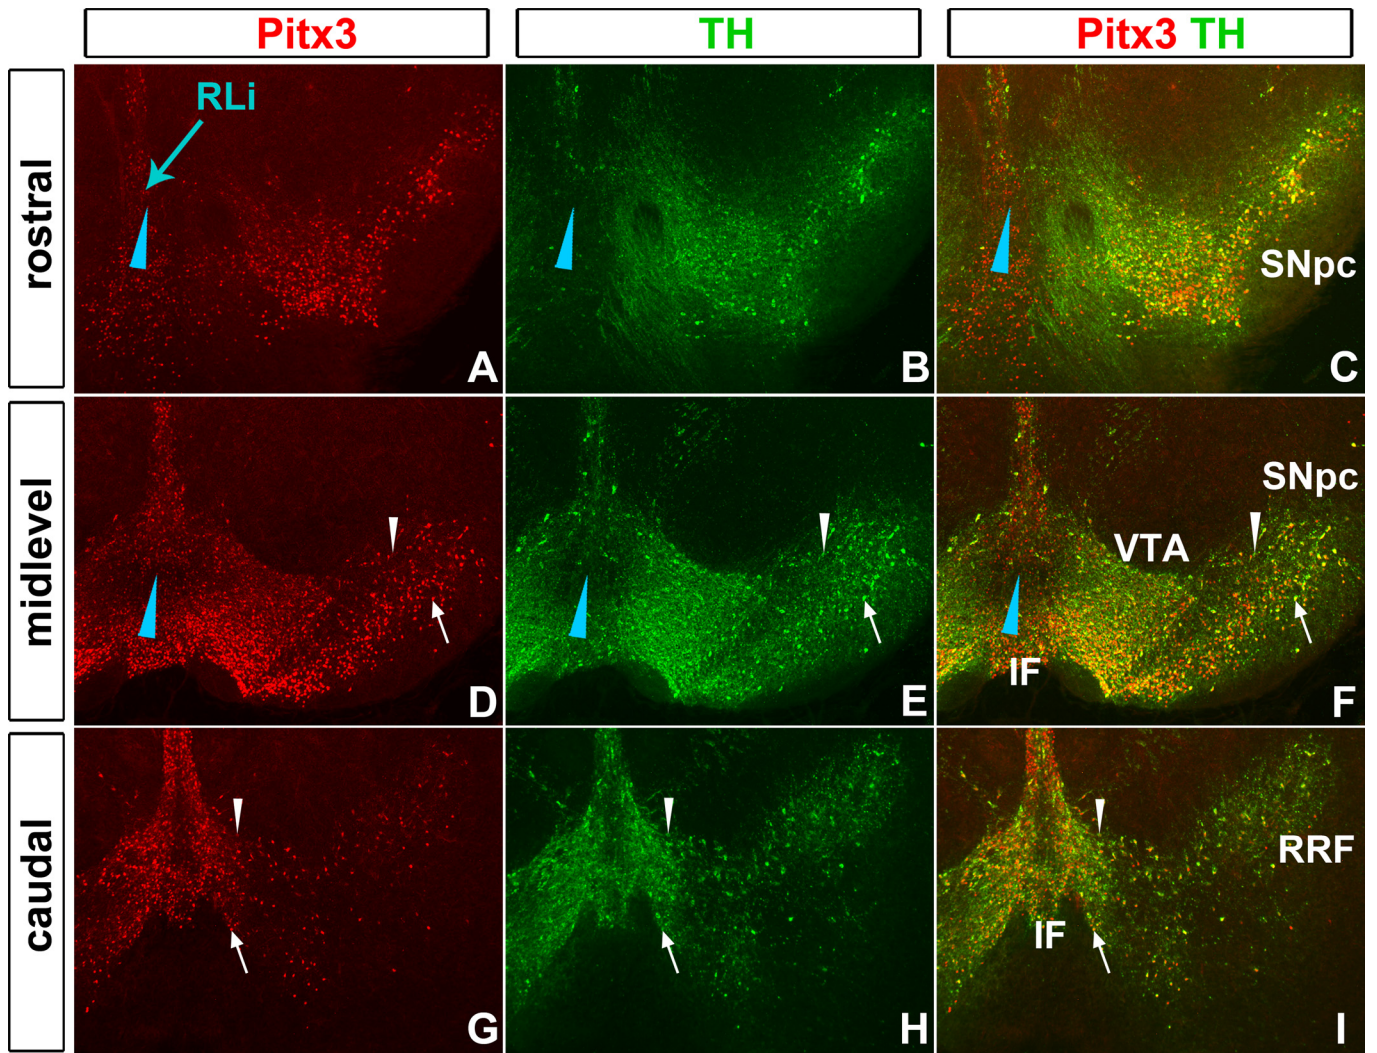

**Fig. S5.** Neurons in the rostral linear nucleus are Pitx3+ but show little to no TH immunoreactivity. (A–I) 18.5-dpc coronal sections labeled with Pitx3 (red) and TH (green). Pitx3+ neurons are detected in rostral linear nucleus (RLi; blue arrow in A and blue arrowheads); many of these neurons have little to no TH immunoreactivity. In contrast, neurons in the substantia nigra pars compacta (SNpc), ventral tegmental area (VTA)/interfascicular nucleus (IF) regions, and retrorubral fields (RRF) coexpress TH and Pitx3. Note also that dopamine (TH+) neurons expressing low (white arrowheads) and high (arrows) levels of Pitx3 are predominantly situated in the dorsal and ventral TH+ regions, respectively. Separate channels in (A and B), (D and E), and (G and H) are shown as merged images in (C), (F), and (I), respectively.











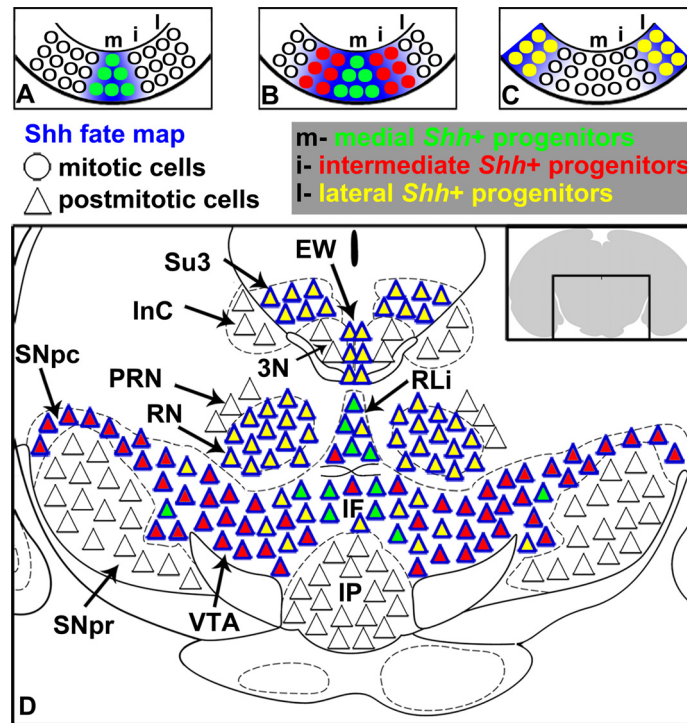

**Fig. 58.** A model for the embryonic origin of midbrain nuclei derived from spatiotemporally separable *Shh*+ progenitors (mid to caudal levels). (A–C) Schematic representation of *Shh*+ domains during midbrain development. Based upon cumulative and inducible genetic fate-mapping results, we estimate that midbrain *Shh*+ progenitors (green, red, and yellow circles) occupy 3 spatiotemporally separable domains: medial (green; *Lmx1a*+), intermediate (red; *Lmx1a*+), and lateral (yellow; largely *Lmx1a*-). (D) Schematic of the adult organization of major midbrain nuclei with respect to their embryonic origin. The color within each triangle depicts the possible progenitor domain from which these nuclei are derived. The medial progenitors (green circles in A and B) predominantly contribute to the rostral linear nucleus (RLi; mostly TH-) and sparsely to the ventral tegmental area (VTA)/interfascicular nucleus (IF) regions, but remarkably little to the substantia nigra pars compacta (SNpc). The intermediate progenitors (red circles in B) contribute to the RLi and dopamine, TH+, neurons in the VTA/IF regions and SNpc. The lateral *Shh*+ progenitors (yellow circles in C) initially delineate the primordium of a *Brn3a*+ cohort that populates the Edinger Westphal nucleus (EW), supraoculomotor nucleus and cap (Su3), and the red nucleus (RN). The lateral progenitors also generate some TH+ neurons. Although in close proximity to *Shh* descendants (blue triangle contour) in the postnatal coronal midbrain sections, several cell populations are largely unlabeled (black triangle contour) in our experiments. Thus, these cells must be derived outside of *Shh*-expressing progenitors. These cells belong to the oculomotor nucleus (3N; *Isl1/2*+), interpeduncular nucleus (IP), and GABAergic neurons of the substantia nigra pars reticulata (SNpr), the parabrachial nucleus (PRN), and the interstitial nucleus of Cajal (InC). Schematic of the midlevel midbrain coronal section is shown in (D) [adapted from Paxinos and coworkers' brain atlas (1)]. Midbrain structures were defined anatomically according to the mouse brain atlases (1, 2) and molecularly, if applicable, using a marker analysis (note: rostral sections shown in this article would be, strictly speaking, considered diencephalic rather than mesencephalic, according to refs. 3 and 4); in accordance with their terminology, we find that the dopaminergic primordium appears to extend from the isthmus to the zona limitans intrathalamica (Fig. 1M). We use "midbrain dopamine neurons (mDA)," as have others (5, 6), to avoid confusion with hypothalamic dopaminergic groups A11–14. Marker composition and anatomical location of the major ventral midbrain nuclei are as follows: (1) Rostral linear nucleus (RLi; *Pitx3*+, *Lmx1a*+, *Lmx1b*+, *Nurr1*+, TH-) is located between mammillotegmental tracts; (2) interfascicular nucleus (IF; *Pitx3*+, *Lmx1a*+, *Lmx1b*+, *Nurr1*+, TH+) is located between the fasciculus retroflexus tracts and immediately ventral to the RLi at rostral levels; it is separated from the RLi by the ventral tegmental decussation at midlevels and caudal levels; (3) ventral tegmental area (VTA) and substantia nigra pars compacta (SNpc; *Pitx3*+, *Lmx1a*+, *Lmx1b*+, *Nurr1*+, TH+) are separated by the medial lemniscus at midlevels; (4) substantia nigra pars reticulata (SNpr; *GATA3*+) is located ventral to the SNpc; (5) subthalamic nucleus (*Pitx3*-, *Lmx1a*+, *Lmx1b*+, *Nurr1*-, TH-) has the ventrolateral position in the posterior hypothalamus immediately adjacent to the cerebral peduncle and rostral to the SNpc; (6) parabrachial nucleus (PRN; *GATA3*+) is located immediately lateral to the RN; (7) nucleus of Darkschewitsch (Dk; *GATA3*+) is situated ventrolaterally in the periaqueductal gray just dorsal to the medial accessory nucleus (MA3); (8) interstitial nucleus of Cajal (InC; *GATA3*+) is abutting the periaqueductal gray just lateral to the Dk; (9) oculomotor nucleus (3N; *Isl1/2*+) is located lateral to the EW, dorsal to the RN, and ventral to the Su3; (10) Edinger Westphal nucleus (EW; *Brn3a*+) is a medial structure immediately dorsal to the RLi and flanked by the MA3 rostrally or the 3N caudally; (11) red nucleus (RN; *Brn3a*+) is located immediately dorsal to the VTA and lateral to the EW/RLi; and (12) supraoculomotor nucleus and cap (Su3; *Brn3a*+) is situated in proximity to the EW and immediately dorsal to the 3N. \*Because *Lmx1a*, *Lmx1b*, and *Nurr1* are also expressed in the posterior hypothalamus and mammillary body, *Pitx3* immunoreactivity was used to distinguish these structures from the RLi.

1. Paxinos G, Franklin KBJ (2001) *The Mouse Brain in Stereotaxic Coordinates* (Academic, London), 2nd Ed.
2. Paxinos G, Ashwell K, Tork I (1994) *Atlas of the Developing Rat Nervous System* (Academic, San Diego), 2nd Ed.
3. Smidt MP, Burbach JP (2007) How to make a mesodiencephalic dopaminergic neuron. *Nat Rev Neurosci* 8(1):21–32.
4. Verney C, Zecevic N, Puelles L (2001) Structure of longitudinal brain zones that provide the origin for the substantia nigra and ventral tegmental area in human embryos, as revealed by cytoarchitecture and tyrosine hydroxylase, calretinin, calbindin, and GABA immunoreactions. *J Comp Neurol* 429(1):22–44.
5. Ang SL (2006) Transcriptional control of midbrain dopaminergic neuron development. *Development* 133(18):3499–3506.
6. Prakash N, Wurst W (2006) Genetic networks controlling the development of midbrain dopaminergic neurons. *J Physiol* 575(Pt 2):403–410.



**Table S1. Semiquantitative analysis of Xgal-labeled cells in Pitx3+ and Brn3a+ midbrain clusters at 18.5 dpc**

| TAM <sup>a</sup> at | SNpc | VTA/IF | RLi  | RN    | EW  | Su3 |
|---------------------|------|--------|------|-------|-----|-----|
| 7.5 dpc             | ±    | +      | +++  | -     | -   | -   |
| 8.0 dpc             | +++  | +++    | ++++ | ±     | -   | -   |
| 8.5–9.5 dpc         | ++++ | ++++   | ++++ | +++++ | +++ | +++ |
| 12.5                | ±    | +      | +    | ±     | ++  | ++  |

<sup>a</sup>TAM activity (and therefore corresponding recombinase activity) is maintained up to 36 h postinjection. (*Left*) In 7.5-dpc TAM injections, in which medial progenitors are labeled, fate-mapped cells are predominantly localized to the RLi, although some are visible in the VTA/IF; few fate-mapped cells are observed in the SNpc. In 8.0-dpc injections, medial and intermediate progenitors are labeled; fate-mapped cells are observed in the SNpc, VTA/IF, and RLi. In both 8.5- and 9.5-dpc injections, fate-mapped cells are observed in all the Pitx3+ clusters. In 12.5-dpc TAM injections, lateral progenitors are labeled and fate-mapped cells are observed in the RLi and VTA/IF region with a few if any in the SNpc. (*Right*) The Brn3a+ neuron cohort localizes mainly to the RN, EW, and Su3. In 7.5-dpc TAM injections, in which medial progenitors are labeled, no labeled cells are observed in these clusters. In 8.0-dpc injections, medial and intermediate progenitors are predominantly labeled, but few lateral progenitors are also labeled. Thus, occasional labeled cells are observed in these clusters. In both 8.5-dpc and 9.5-dpc injections, when medial, intermediate, and lateral domains are labeled, maximal labeling is observed in all the Brn3a+ clusters. In 12–5 dpc injections, lateral progenitors are preferentially labeled, and contribute to the EW and Su3 but less to the RN. This is in accordance with birthdating studies of the RN, showing a relatively early neurogenetic interval ending at 12.5 dpc. Together, these data suggest that the Brn3a cohort is derived from lateral *Shh*+ progenitors.
